# Supplementary material
Source: PubMed Central journal article supplement (PMC6777595)

**Supplemental Table 1. Total missing numbers for each baseline characteristic**

| <b>Characteristics</b>      | <b>Missing numbers (n, %)</b> |
|-----------------------------|-------------------------------|
| Body mass index             | 100 (<1%)                     |
| Ethnicity                   | 56 (<1%)                      |
| Chronic lung disease        | 18 (<1%)                      |
| Coronary artery disease     | 18 (<1%)                      |
| Peripheral vascular disease | 20 (<1%)                      |
| Cerebrovascular disease     | 19 (<1%)                      |
| Diabetes                    | 22 (<1%)                      |

**Supplemental Table 2. A map of the causes of death to the categories of death in this ANZDATA cohort study.**

| <b>Categories of death</b> | <b>Causes of death</b>                                                                                                                                                        |
|----------------------------|-------------------------------------------------------------------------------------------------------------------------------------------------------------------------------|
| Infection                  | Specified by site (central nervous system, lung, urinary tract, wound, shunt, peritoneum, septicaemia, liver, other) and organism (bacterial, viral, fungal, protozoa, other) |
|                            |                                                                                                                                                                               |
| Cardiac                    | Myocardial ischaemia and infarction                                                                                                                                           |
|                            | Pulmonary oedema                                                                                                                                                              |
|                            | Hyperkalaemia                                                                                                                                                                 |
|                            | Haemorrhagic pericarditis                                                                                                                                                     |
|                            | Hypertensive cardiac failure                                                                                                                                                  |
|                            | Cardiac arrest – cause uncertain                                                                                                                                              |
|                            | Other causes of cardiac failure                                                                                                                                               |
|                            |                                                                                                                                                                               |
| Withdrawal                 | Withdrawal for psycho-social reasons                                                                                                                                          |
|                            | Withdrawal for cardiovascular co-morbidities                                                                                                                                  |
|                            | Withdrawal for cerebrovascular co-morbidities                                                                                                                                 |
|                            | Withdrawal for peripheral vascular co-morbidities                                                                                                                             |
|                            | Withdrawal related to dialysis access                                                                                                                                         |
|                            | Suicide                                                                                                                                                                       |
|                            |                                                                                                                                                                               |
| Malignancy                 | Withdrawal related to malignancy                                                                                                                                              |
|                            | Malignant disease                                                                                                                                                             |
|                            | Cachexia                                                                                                                                                                      |
|                            |                                                                                                                                                                               |
| Miscellaneous              | Hepatic failure                                                                                                                                                               |
|                            | Uraemia caused by graft failure                                                                                                                                               |
|                            | Pancreatitis                                                                                                                                                                  |
|                            | Bone marrow depression                                                                                                                                                        |
|                            | Perforation of abdominal viscus – peptic ulcer, diverticulum, appendix                                                                                                        |
|                            | Dialysis dementia (aluminium)                                                                                                                                                 |
|                            | Chronic respiratory failure                                                                                                                                                   |
|                            | Sclerosing peritonitis                                                                                                                                                        |
|                            | Vascular (pulmonary embolus, cerebrovascular accident, gastrointestinal haemorrhage, bowel infarction)                                                                        |

**Supplemental Table 3. Specific pathogens associated with infection-related mortality**

| <b>Specific organism</b> | <b>Number (n, %)</b> |
|--------------------------|----------------------|
| <b>Bacteria</b>          | <b>223 (54%)</b>     |
| Escherichia coli         | 29 (7%)              |
| Enterococcus             | 24 (6%)              |
| Klebsiellosis            | 20 (5%)              |
| Nocardia                 | 12 (3%)              |
| Staphylococcus           | 67 (16%)             |
| Other                    | 71 (17%)             |
| <b>Viruses</b>           | <b>34 (8%)</b>       |
| Cytomegalovirus          | 18 (4%)              |
| Hepatitis B              | 4 (1%)               |
| Influenza                | 7 (2%)               |
| Other                    | 5 (1%)               |
| <b>Fungi</b>             | <b>75 (18%)</b>      |
| Aspergillus              | 33 (8%)              |
| Cryptococcus             | 15 (4%)              |
| Pneumocystis             | 19 (5%)              |
| Candida                  | 5 (1%)               |
| Other                    | 3 (1%)               |

## Supplemental Figure 1

(A) Overall organism-specific incidence mortality rates, following 12 months of transplantation, by transplant era.

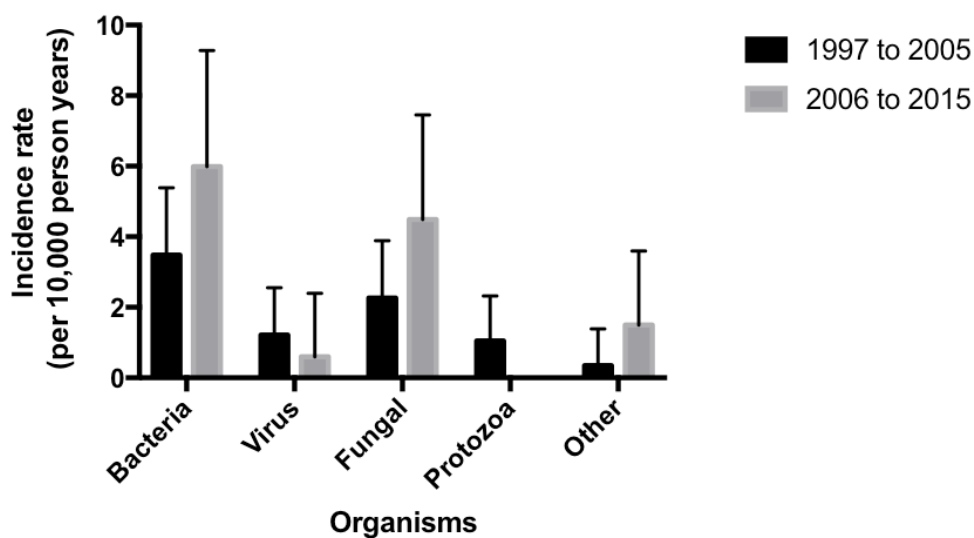

(B) Overall site-specific incidence mortality rates, following 12 months of transplantation, by transplant era. Error bars depict the upper 95% confidence limit.

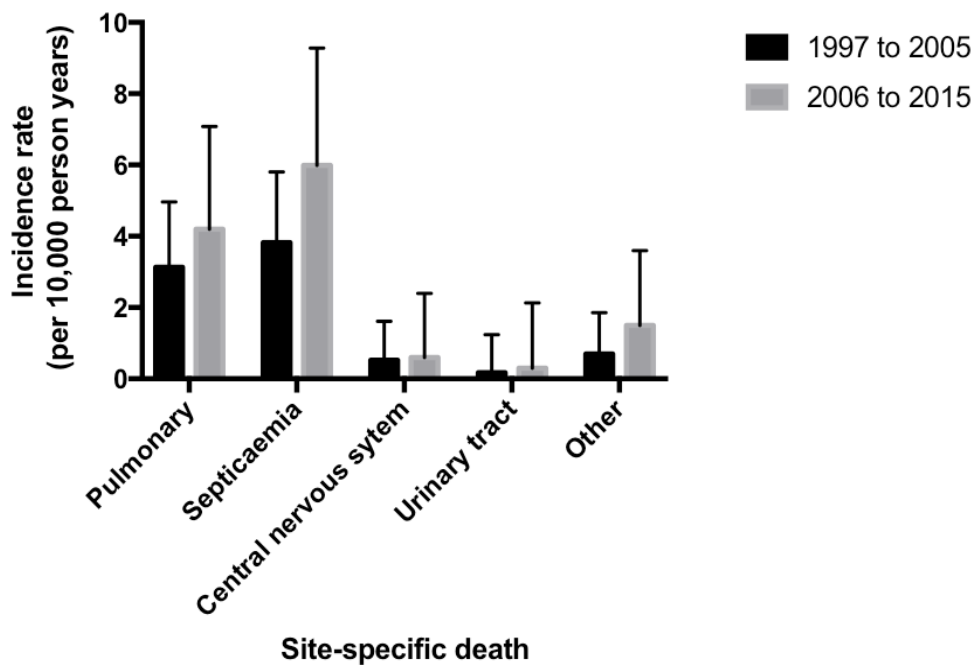

Supplement: CJN.03200319SupplementaryData.pdf [file CJN.03200319SupplementaryData.pdf]
